# Supplementary material
Source: Springer Nature journal article supplement (https://www.springermedizin.de/resource/supplementary/13643_2014_339_MOESM10_ESM.pdf/9681704)

**Top 10 full text downloads 2009**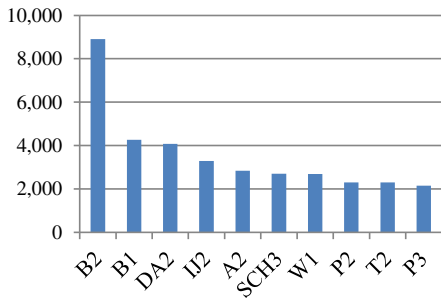**Top 10 abstract downloads 2009**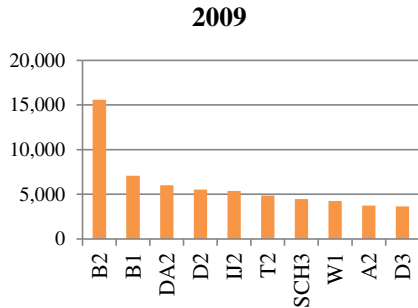**Top 10 full text downloads 2010**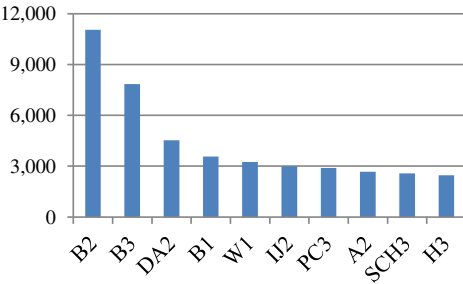**Top 10 abstract downloads 2010**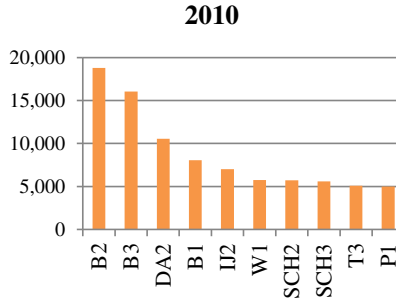**Top 10 full text downloads 2011**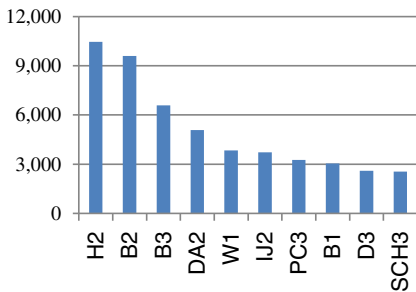**Top 10 abstract downloads 2011**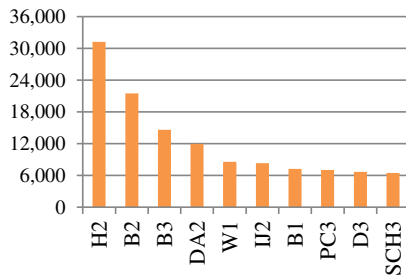

Supplement: MOESM10 [file 9681704]
